# Supplementary material for: Solid-state reduction of silica nanoparticles via oxygen abstraction from SiO4 units by polyolefins under mechanical stressing
Source: Royal Society of Chemistry journal article supplement (doi:10.1039/c8ra07271j), 2018-01-01
Supplement: c8ra07271j1.pdf [file c8ra07271j1.pdf]

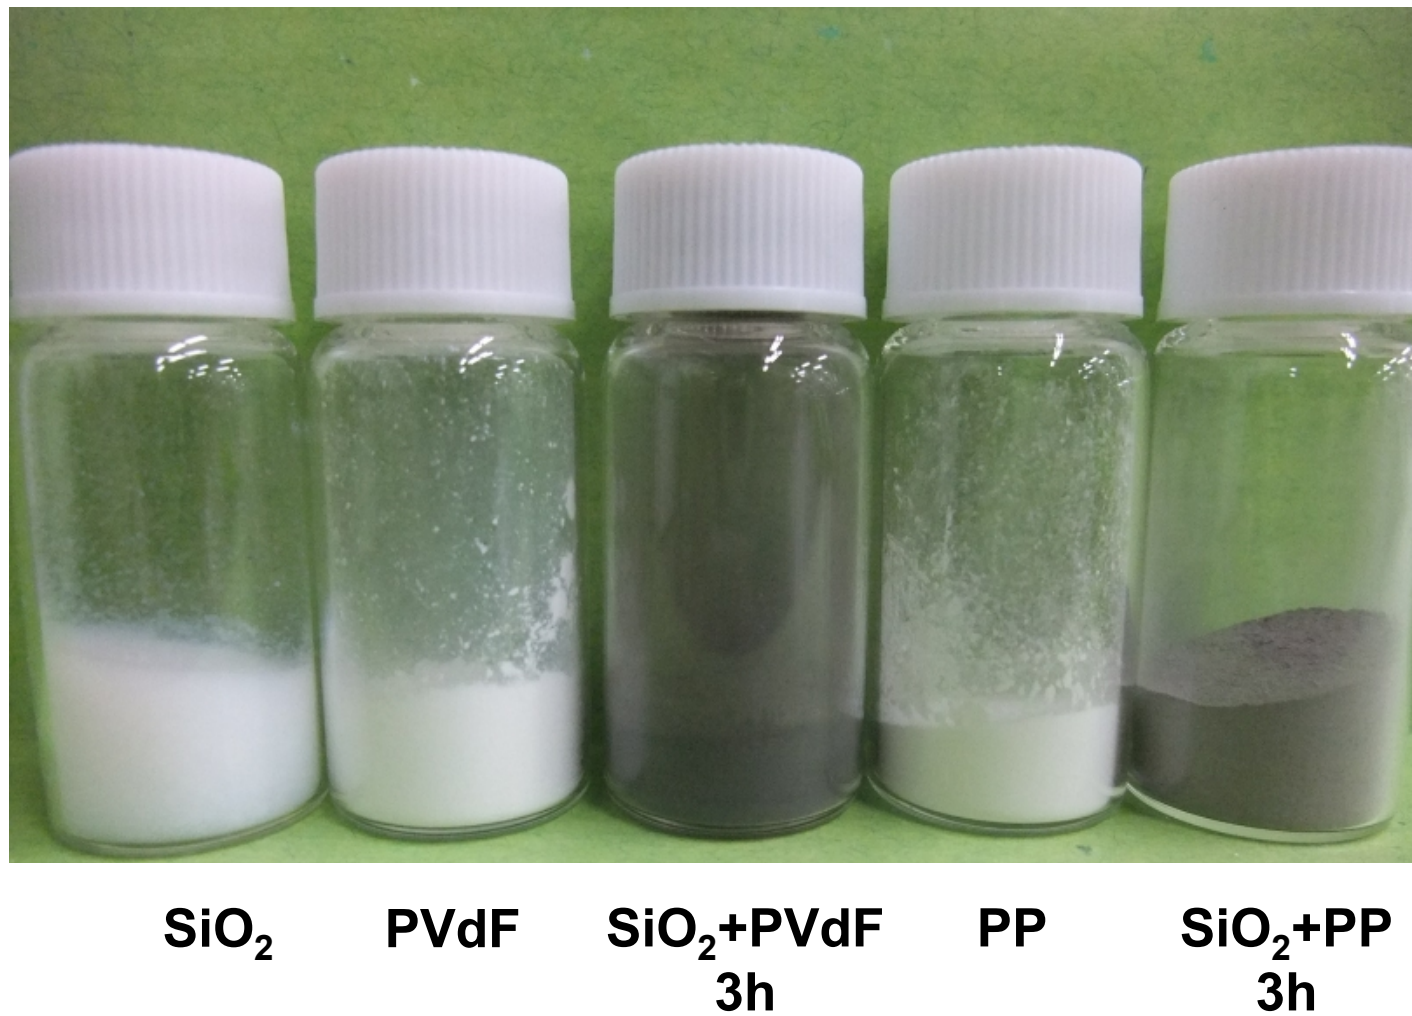

Fig. S1 Color change of the samples by co-milling

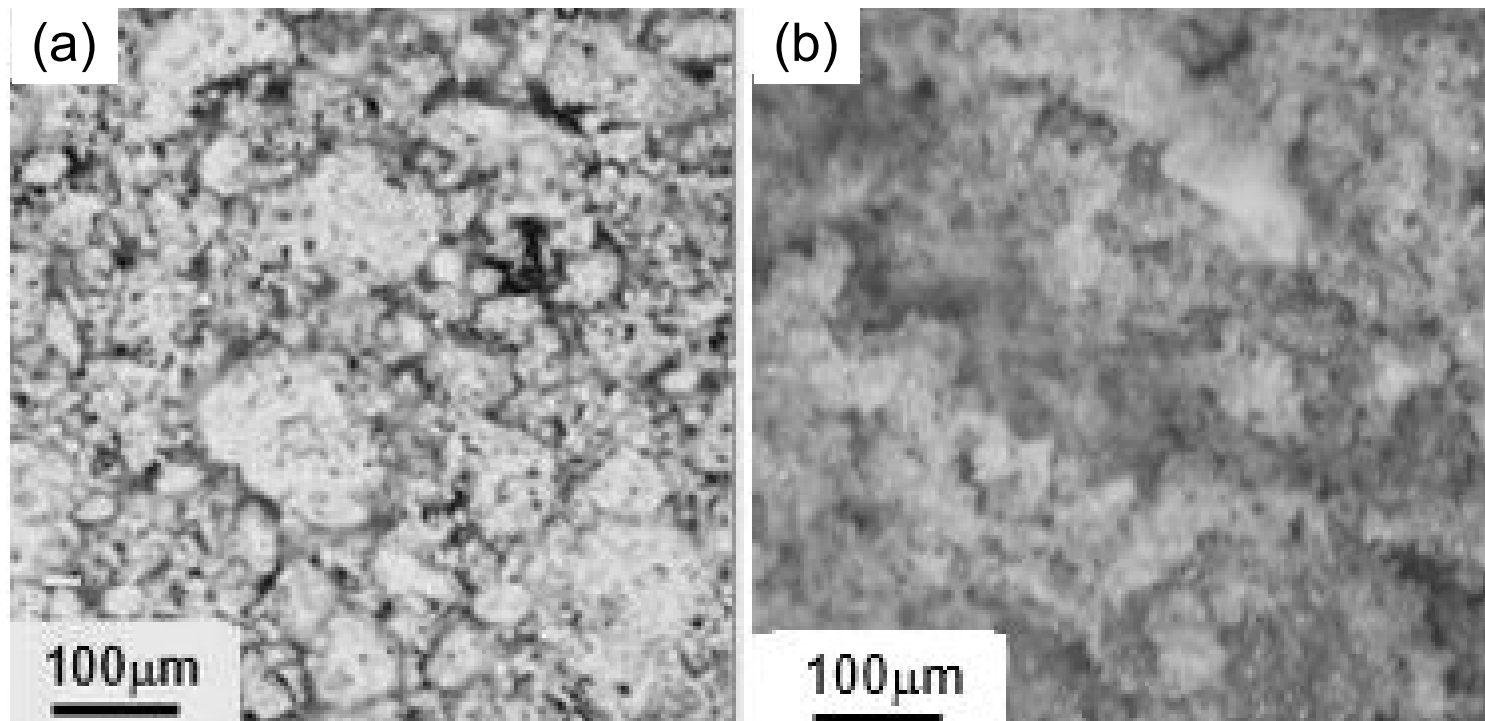

Fig. S2 SEM image of  $\text{SiO}_2$  co-milled with (a) PVdF, (b) PP for 3 h

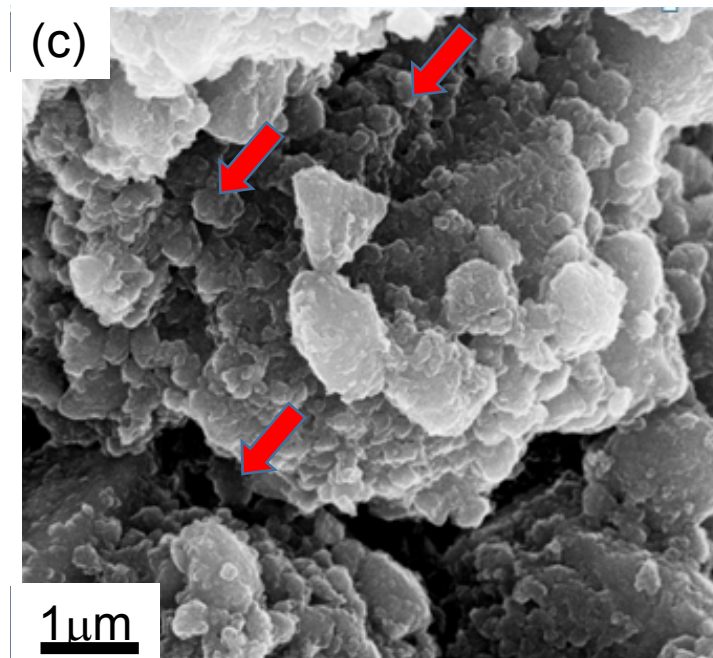

Fig.S3 Co-milled with PP for 3h with higher magnification. The dark particles marked by the arrows correspond to the dark dots shown in Fig. S2(b).which might be associated with carbon species, although further confirmation is needed.
